# Supplementary material for: pH-Responsive Hybrid Hydrogels as Antibacterial and Drug Delivery Systems
Source: MDPI journal article supplement (doi:10.3390/polym10060660), 2018-06-13
Supplement: s1 [file s1]

## Supplementary material

### pH-Responsive Hybrid Hydrogels as Antibacterial and Drug Delivery Systems

Shabnam Sattari, Abbas Dadkhah Tehrani, Mohsen Adeli\*

Department of Chemistry, Faculty of Science, Lorestan University, Khorram Abad, Iran

E-mail: aadeli@fu-berlin.de

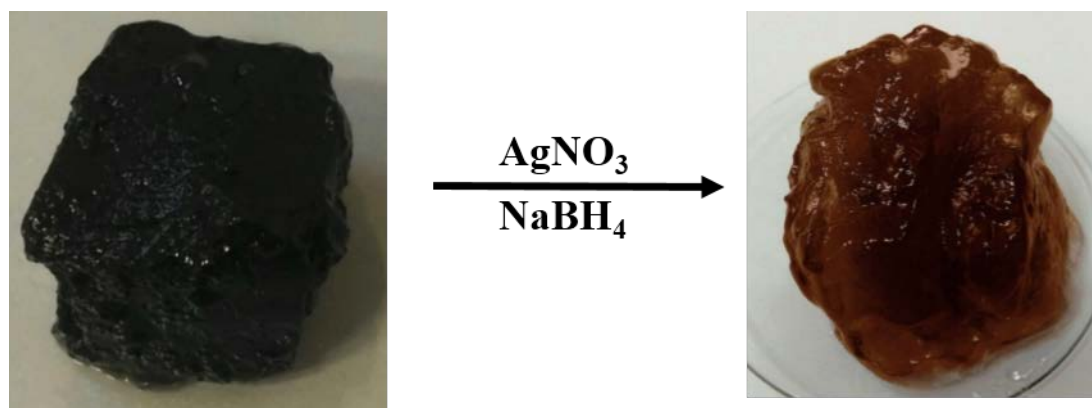

Figure S1: Photographs of before and after the formation of silver nanoparticles of silver nanoparticles

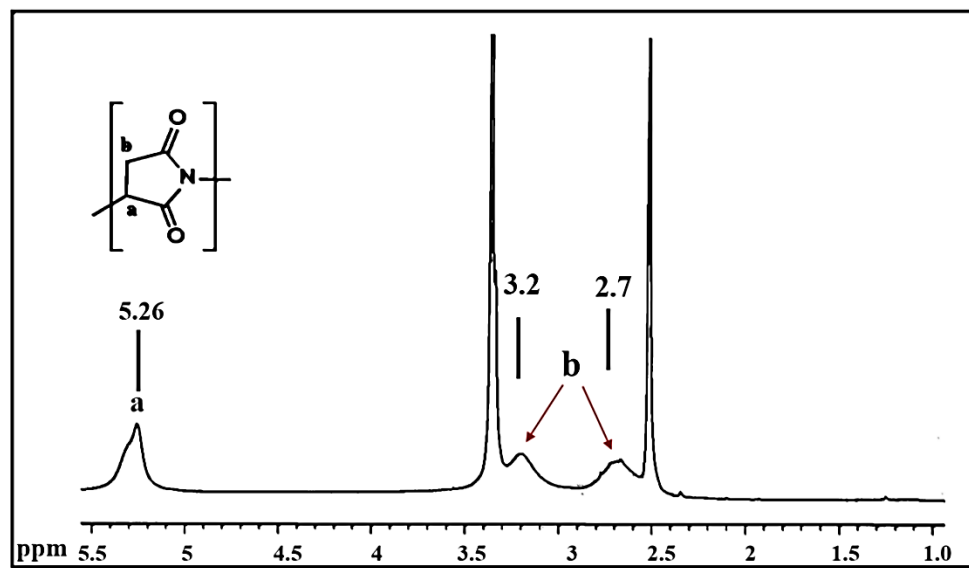

Fig. S2.  $^1\text{H}$  NMR spectra of PSI.

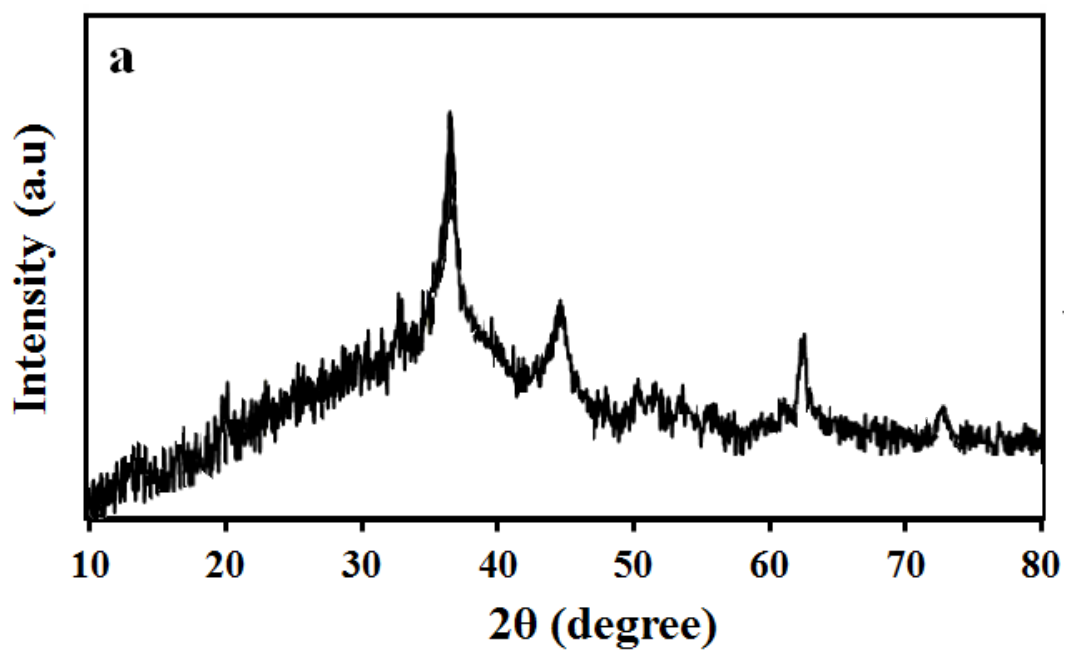

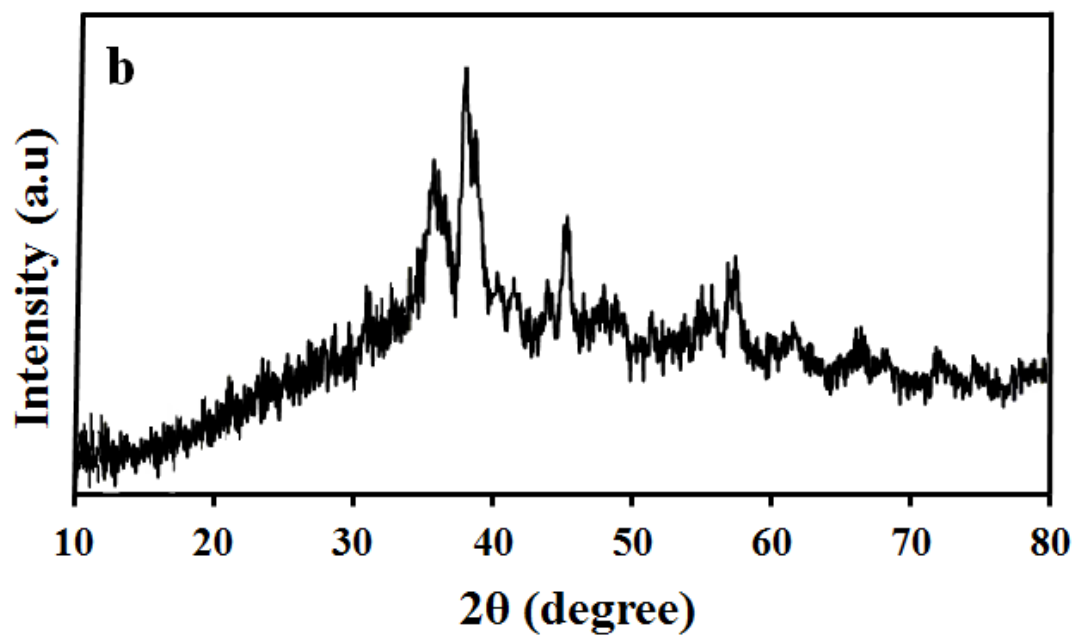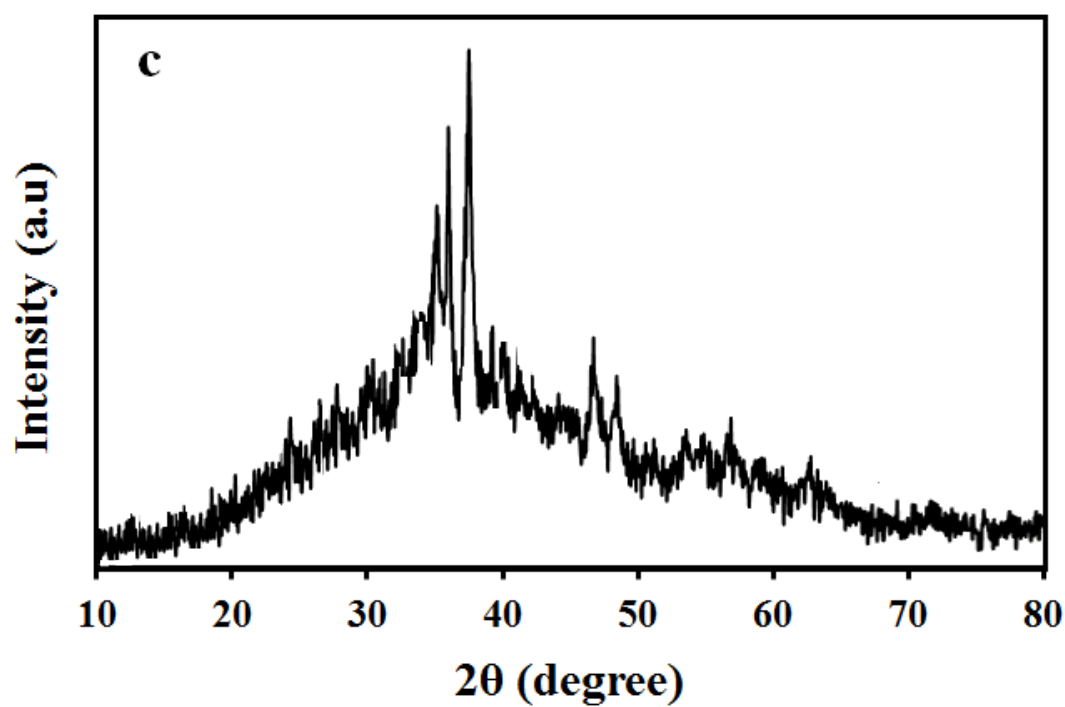

Figure S3: X-ray diffraction pattern of a) IPN1, b) IPN4 c) IPN7 NPs hydrogel.

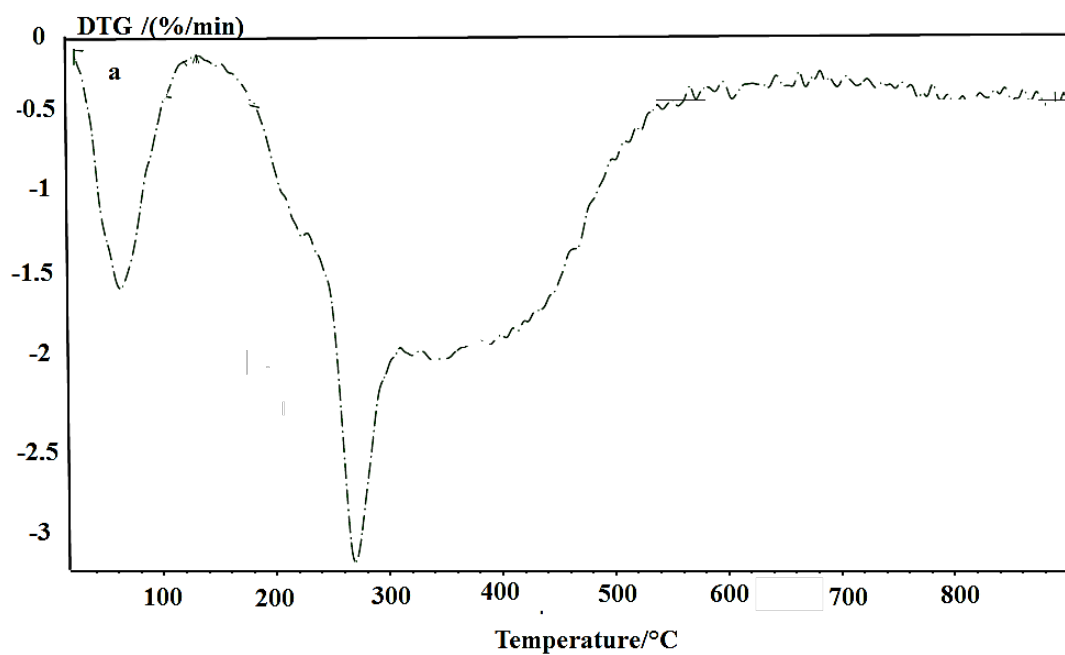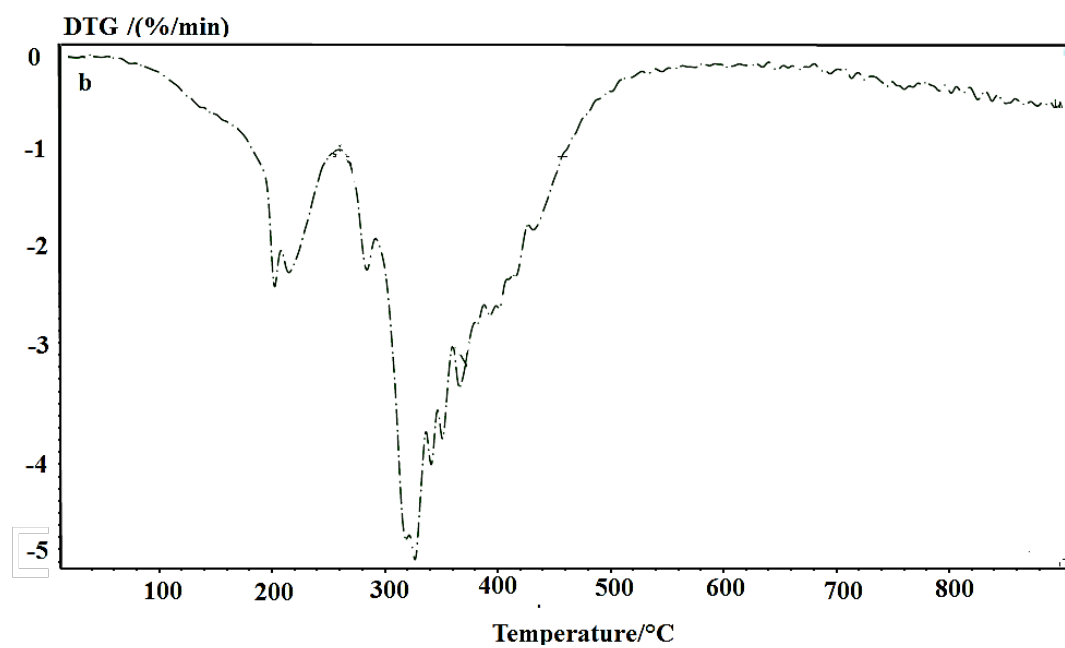

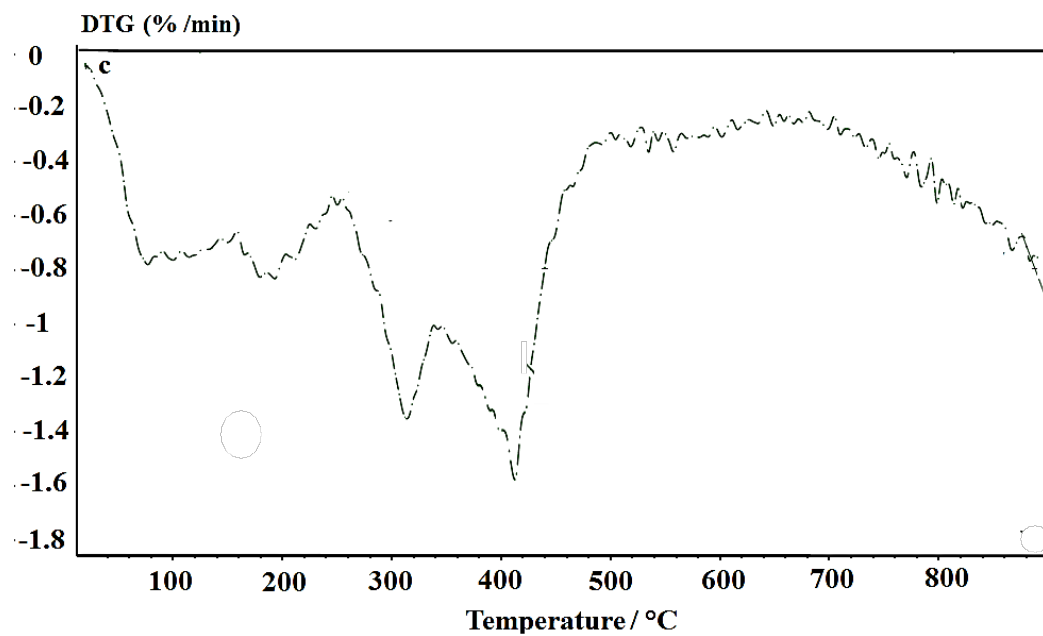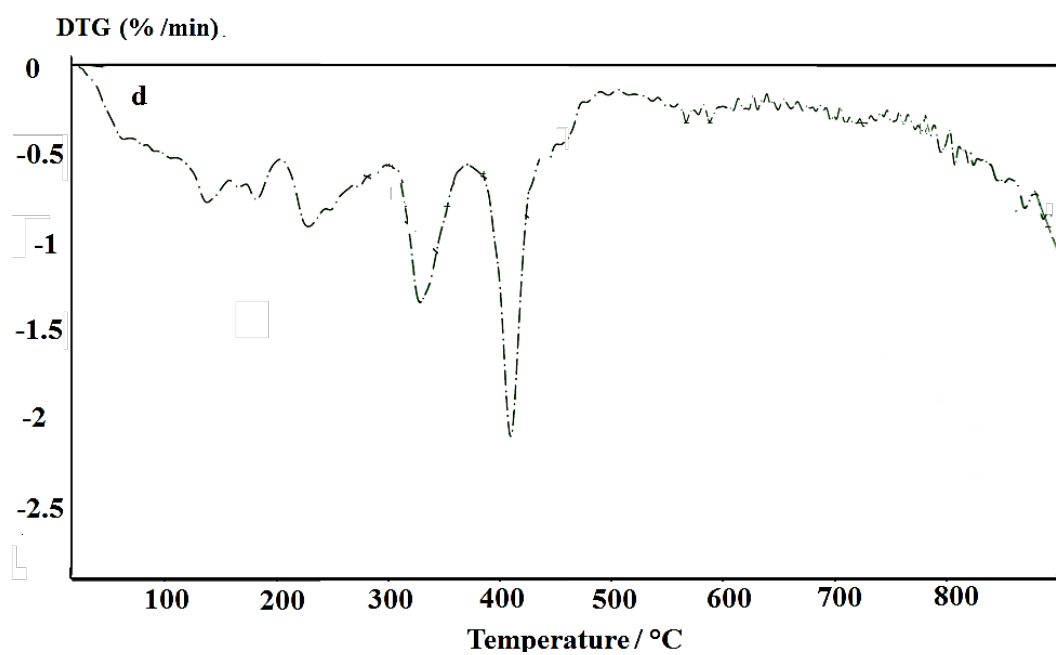

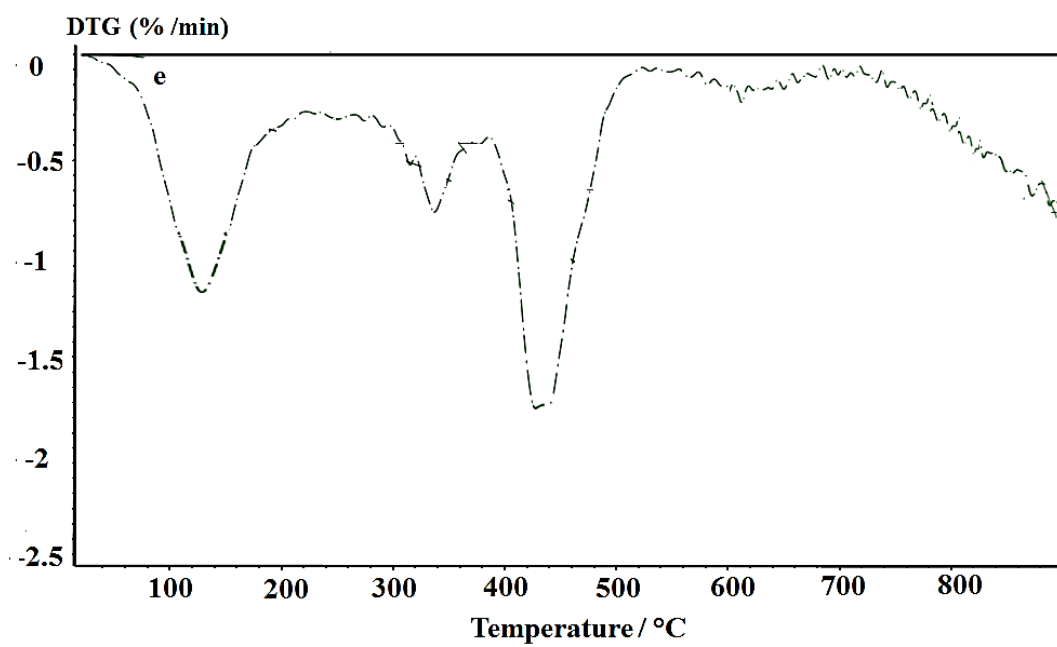

Figure S4. DTG thermograms of a) PAsp hydrogel, b) IPN0, c)IPN2, d)IPN5 and e) IPN8

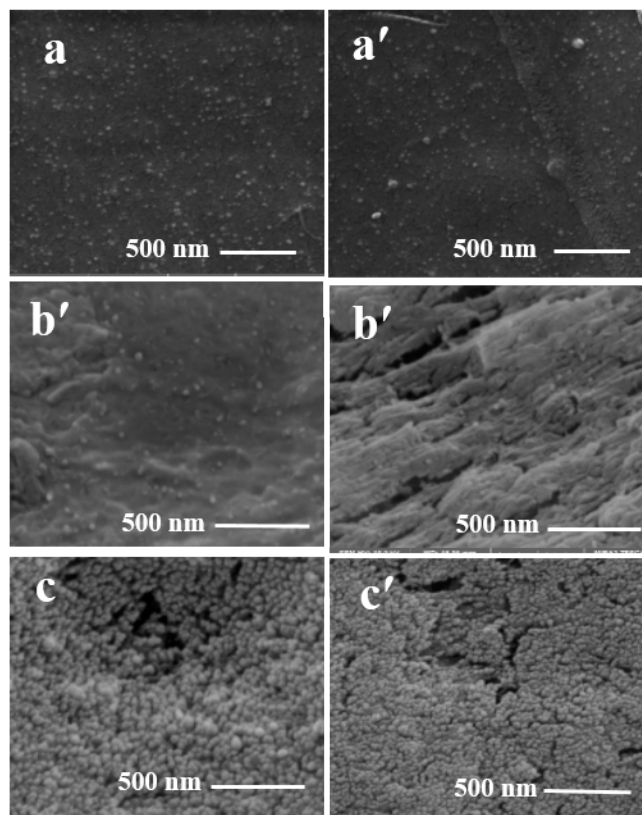

Figure S5: SEM images of a) IPN2, a) IPN3 b)IPN4, b)IPN6, c)IPN8, c)IPN9

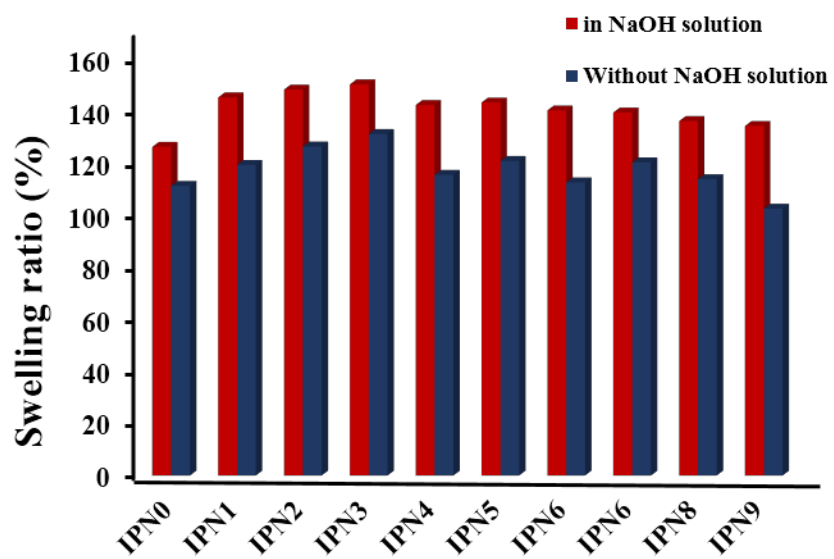

Figure S6: Swelling behavior of different hydrogels at 25°C, before and after placement of hydrogels in a NaOH solution.

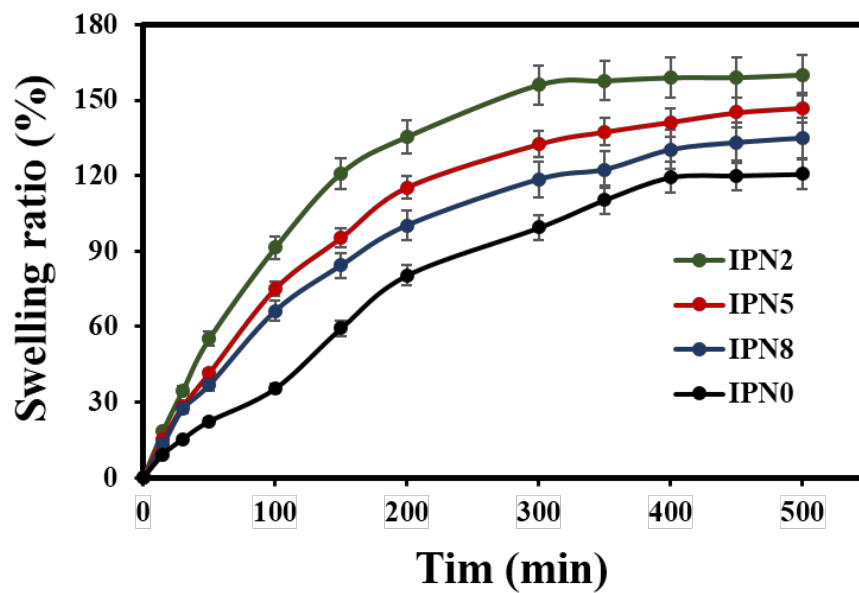

Figure S7: Swelling of the hydrogels IPNs and IPNs NPs hydrogels at pH 7.4.

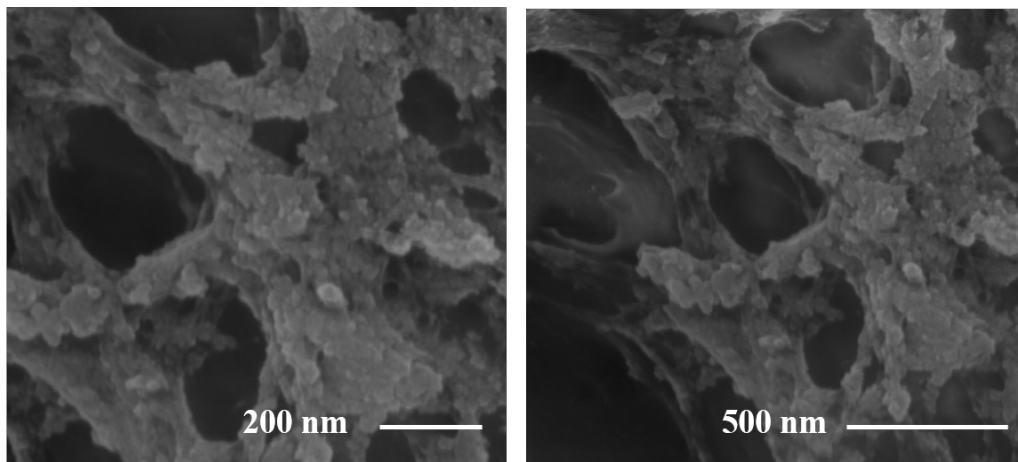

Figure 8. SEM images of IPN5 hydrogel in two different magnifications



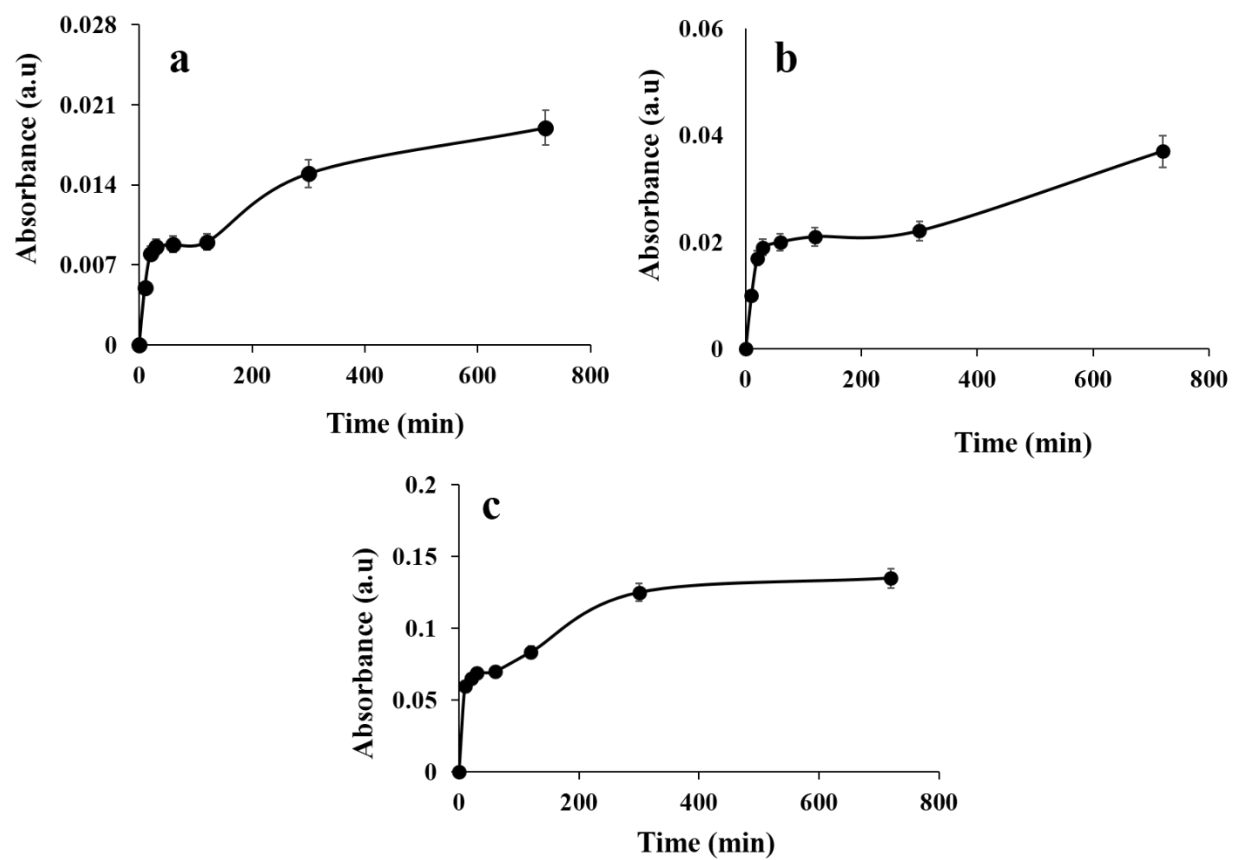

Figure S9. The release of nanoparticles from a) IPN1, b) IPN4 and c) IPN7 hydrogel.
